# Supplementary material for: Neurofilaments can differentiate ALS subgroups and ALS from common diagnostic mimics
Source: PubMed Central journal article supplement (PMC8585882; doi:10.1038/s41598-021-01499-6), 2021-11-11
Supplement: 41598_2021_1499_MOESM1_ESM.pdf [file 41598_2021_1499_MOESM1_ESM.pdf]

## Neurofilaments can differentiate ALS subgroups and ALS from common diagnostic mimics.

**Authors:** Arvin Behzadi, Fani Pujol-Calderón, Anton E. Tjust, Anna Wuolikainen, Kina Höglund, Karin Forsberg, Erik Portelius, Kaj Blennow, Henrik Zetterberg, Peter Munch Andersen

**Supplementary Table S1.** Patient demographics.

| <b>ALS patient characteristics</b>                                                |                                                 |
|-----------------------------------------------------------------------------------|-------------------------------------------------|
| ALS symptom onset: spinal onset/bulbar onset/truncal onset/FTD onset/unknown      | 148 (63.2)/72 (30.8)/11 (4.7)/1 (0.4)/2 (0.9)   |
| Sex: male/female                                                                  | 124 (53.0)/110 (47.0)                           |
| Sex spinal onset: male/female                                                     | 86 (58.1)/62 (41.9)                             |
| Sex bulbar onset: male/female                                                     | 30 (41.7)/42 (58.3)                             |
| Mutation status: no known mutation/ <i>SOD1</i> / <i>C9orf72HRE</i> / <i>VAPB</i> | 175 (74.8)/28 (12.0)/28 (12.0)/3 (1.2)          |
| ALSFRS-R at sampling: all ALS/spinal onset ALS/bulbar onset ALS                   | 42; 38-45/42; 38-45/43; 39-45                   |
| ALSFRS-R at sampling: no known mutation/ <i>SOD1</i> / <i>C9orf72HRE</i>          | 42; 39-45/41; 36-44/41; 38-45                   |
| $\Delta$ FS at sampling: all ALS/spinal onset ALS/bulbar onset ALS                | 0.45; 0.23-0.90/0.38; 0.22-0.81/0.64; 0.27-1.08 |
| $\Delta$ FS at sampling: no known mutation/ <i>SOD1</i> / <i>C9orf72HRE</i>       | 0.40; 0.23-0.89/0.34; 0.08-1.00/0.52; 0.38-0.92 |
| Age at symptom onset: all ALS/spinal onset ALS/bulbar onset ALS                   | 61.7 $\pm$ 13.4/57.9 $\pm$ 13.3/68.7 $\pm$ 11.4 |
| Age at symptom onset: no known mutation/ <i>SOD1</i> / <i>C9orf72HRE</i>          | 64.0 $\pm$ 13.2/50.3 $\pm$ 11.7/61.1 $\pm$ 9.0  |
| Survival after symptom onset: all ALS/spinal onset ALS/bulbar onset ALS           | 2.9; 1.8-4.4/3.3; 2.3-5.4/2.5; 1.5-3.1          |
| Survival after symptom onset: no known mutation/ <i>SOD1</i> / <i>C9orf72HRE</i>  | 2.8; 1.7-4.1/5.2; 2.8-14.1/2.7; 1.8-3.3         |
| Age at death: all ALS/spinal onset ALS/bulbar onset ALS                           | 67.1 $\pm$ 11.9/64.3 $\pm$ 11.9/71.7 $\pm$ 10.9 |
| Age at death: no known mutation/ <i>SOD1</i> / <i>C9orf72HRE</i>                  | 68.4 $\pm$ 11.7/59.0 $\pm$ 13.1/65.1 $\pm$ 8.8  |
| Survival groups: <2 years/2 to <5 years/5 to <10 years/ $\geq$ 10 years           | 57 (26.8)/110 (51.6)/27 (12.7)/19 (8.9)         |
| <b>ALS mimics characteristics</b>                                                 |                                                 |
| Sex: male/female                                                                  | 31 (70.5)/13 (29.5)                             |
| Age of symptom onset                                                              | 57.5 $\pm$ 14.2                                 |
| Survival after symptom onset                                                      | 5.9; 2.5-14.7                                   |
| Age at death                                                                      | 73.2 $\pm$ 13.8                                 |

Data are presented as either frequency and percentage, arithmetic mean  $\pm$  SD or median; Q1-Q3. Age of symptom onset, survival after symptom onset and age at death are presented in years. ALS: amyotrophic lateral sclerosis, FTD: Fronto-temporal dementia, *SOD1*: superoxide dismutase type 1 gene, *C9orf72HRE*: hexanucleotide repeat expansion in the *C9orf72* gene, *VAPB*: Vesicle-Associated Protein type B gene, ALSFRS-R: revised ALS functional rating scale,  $\Delta$ FS: disease progression rate (from onset of first paresis to sampling event).
